# Supplementary material for: Catanionic vesicles charged with chloroaluminium phthalocyanine for topical photodynamic therapy. In vitro phototoxicity towards human carcinoma and melanoma cell lines
Source: Royal Society of Chemistry journal article supplement (doi:10.1039/c4ra04876h), 2014-08-11
Supplement: c4ra04876h1.pdf [file c4ra04876h1.pdf]

## Catanionic vesicles charged with chloroaluminium phthalocyanine for topical photodynamic therapy: *In vitro* phototoxicity on human oral carcinoma and melanoma cell lines

Pauline Castagnos,<sup>[a]</sup> Marigilson P. Siqueira-Moura,<sup>[a,b]</sup> Patricia Leme Goto,<sup>[a,b]</sup>  
Emile Perez,<sup>[a]</sup> Sophie Franceschi,<sup>[a]</sup> Isabelle Rico-Lattes,<sup>[a]</sup> Antonio C.  
Tedesco,<sup>[b]</sup> Muriel Blanzat\*<sup>[a]</sup>

### Characterization of TriCat non-loaded vesicles

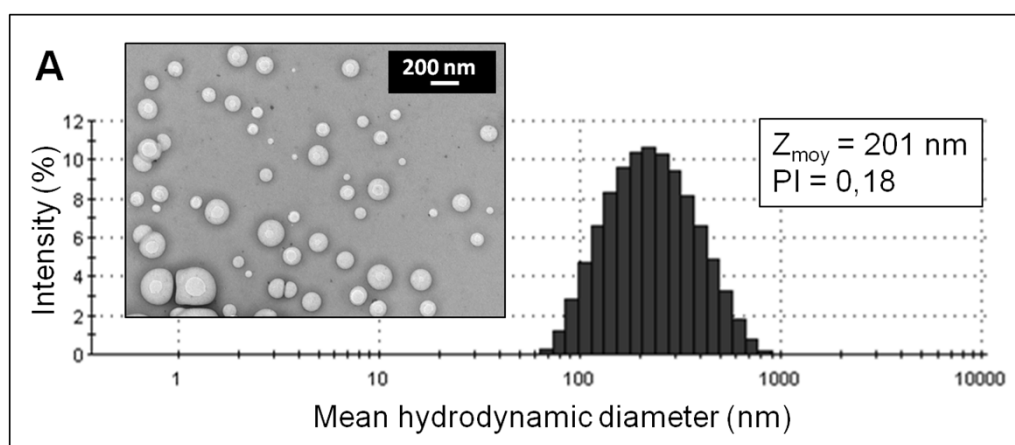

**Figure S1.** TEM snapshot and size distribution of catanionic vesicles of TriCat prepared at 25°C ( $1 \times 10^{-4}$ M).

### Photocytotoxicity assays: Values of toxicity

Following tables give exact values of mean and SEM obtained from cytotoxicity assays performed on B16-F10 and OSCC under several light doses.

#### B16-F10

Cells pre-incubated with TriCat/ClAlPc vesicles

|                                   |       |       |       |       |      |      |
|-----------------------------------|-------|-------|-------|-------|------|------|
| Light dose ( $\text{J cm}^{-2}$ ) | 0.5   | 1.0   | 2.5   | 5.0   | 10   | 15   |
| Cell viability (%)                | 65.76 | 41.77 | 27.27 | 14.08 | 7.56 | 1.94 |
| SEM of cell viability (%)         | 1.06  | 9.57  | 7.25  | 5.38  | 2.83 | 0.17 |

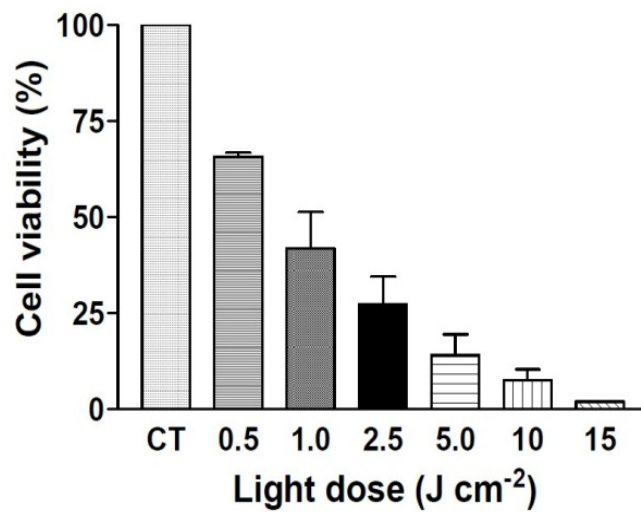

Figure SI.2. Histogram presenting viability rates of B16-F10 under light irradiation. after pre-incubation with TriCat/CIAIPc vesicles.

### OSCC

Cells pre-incubated with TriCat/CIAIPc vesicles

|                                  |       |       |       |       |       |      |
|----------------------------------|-------|-------|-------|-------|-------|------|
| Light dose (J cm <sup>-2</sup> ) | 0.5   | 1.0   | 2.5   | 5.0   | 10    | 15   |
| Cell viability (%)               | 50.20 | 62.06 | 33.80 | 18.17 | 10.21 | 5.73 |
| SEM of cell viability (%)        | 2.77  | 0.98  | 4.40  | 4.57  | 0.64  | 1.00 |

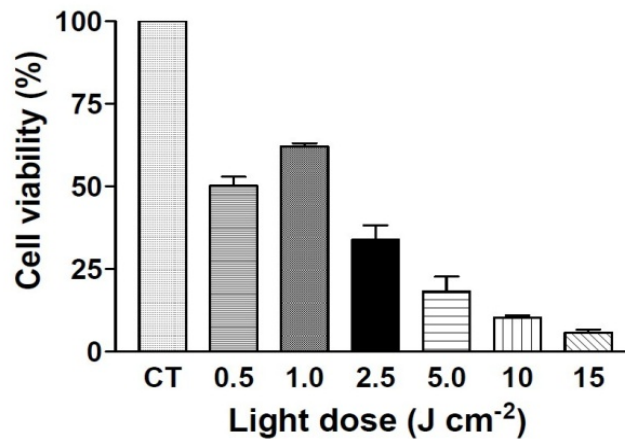

Figure SI.3. Histogram presenting viability rates of OSCC under light irradiation. after pre-incubation with TriCat/CIAIPc vesicles.

### Photocytotoxicity assays: Statistical analysis

Statistical analysis was performed using Prism 4.0® (GraphPad Software) by one-way ANOVA and Tukey test. All data were expressed as the mean  $\pm$  SEM of three independent experiments, obtained on samples provided by independent sources. Statistical significance for this study was considered at  $p < 0.05$ .

### B16-F10

Table Analyzed

Results for B16-F10

One-way analysis of variance

P value P<0.0001  
 P value summary \*\*\*  
 Are means signif. different? (P < 0.05) Yes  
 Number of groups 7  
 F 48.23  
 R squared 0.9539

| ANOVA Table                 | SS    | Df | MS    |
|-----------------------------|-------|----|-------|
| Treatment (between columns) | 22600 | 6  | 3767  |
| Residual (within columns)   | 1094  | 14 | 78.11 |
| Total                       | 23700 | 20 |       |

| Tukey's Multiple Comparison Test | Mean Diff. | Q     | P value   | 95% CI of diff   |
|----------------------------------|------------|-------|-----------|------------------|
| CT vs 0.5                        | 34.24      | 6.710 | P < 0.01  | 9.599 to 58.88   |
| CT vs 1.0                        | 58.23      | 11.41 | P < 0.001 | 33.59 to 82.87   |
| CT vs 2.5                        | 72.73      | 14.25 | P < 0.001 | 48.09 to 97.37   |
| CT vs 5.0                        | 85.92      | 16.84 | P < 0.001 | 61.28 to 110.6   |
| CT vs 10                         | 92.44      | 18.12 | P < 0.001 | 67.80 to 117.1   |
| CT vs 15                         | 98.06      | 19.22 | P < 0.001 | 73.42 to 122.7   |
| 0.5 vs 1.0                       | 23.99      | 4.701 | P > 0.05  | -0.6512 to 48.63 |
| 0.5 vs 2.5                       | 38.49      | 7.543 | P < 0.01  | 13.85 to 63.13   |
| 0.5 vs 5.0                       | 51.68      | 10.13 | P < 0.001 | 27.04 to 76.32   |
| 0.5 vs 10                        | 58.20      | 11.40 | P < 0.001 | 33.56 to 82.84   |
| 0.5 vs 15                        | 63.82      | 12.51 | P < 0.001 | 39.18 to 88.46   |
| 1.0 vs 2.5                       | 14.50      | 2.842 | P > 0.05  | -10.14 to 39.14  |
| 1.0 vs 5.0                       | 27.69      | 5.427 | P < 0.05  | 3.052 to 52.33   |
| 1.0 vs 10                        | 34.21      | 6.704 | P < 0.01  | 9.565 to 58.85   |
| 1.0 vs 15                        | 39.83      | 7.806 | P < 0.01  | 15.19 to 64.47   |
| 2.5 vs 5.0                       | 13.19      | 2.586 | P > 0.05  | -11.45 to 37.83  |
| 2.5 vs 10                        | 19.71      | 3.862 | P > 0.05  | -4.935 to 44.35  |
| 2.5 vs 15                        | 25.33      | 4.965 | P < 0.05  | 0.6921 to 49.97  |
| 5.0 vs 10                        | 6.513      | 1.276 | P > 0.05  | -18.13 to 31.15  |
| 5.0 vs 15                        | 12.14      | 2.379 | P > 0.05  | -12.50 to 36.78  |
| 10 vs 15                         | 5.627      | 1.103 | P > 0.05  | -19.01 to 30.27  |

### OSCC

Table Analyzed

Results for OSCC

One-way analysis of variance

P value P<0.0001  
 P value summary \*\*\*  
 Are means signif. different? (P < 0.05) Yes  
 Number of groups 7

F 157.0  
R squared 0.9854

| ANOVA Table                 | SS    | df | MS    |
|-----------------------------|-------|----|-------|
| Treatment (between columns) | 20300 | 6  | 3384  |
| Residual (within columns)   | 301.7 | 14 | 21.55 |
| Total                       | 20600 | 20 |       |

| Tukey's Multiple Comparison Test | Mean Diff. | q     | P value   | 95% CI of diff   |
|----------------------------------|------------|-------|-----------|------------------|
| CT vs 0.5                        | 49.80      | 18.58 | P < 0.001 | 36.86 to 62.74   |
| CT vs 1.0                        | 37.94      | 14.16 | P < 0.001 | 25.00 to 50.88   |
| CT vs 2.5                        | 66.20      | 24.70 | P < 0.001 | 53.26 to 79.14   |
| CT vs 5.0                        | 81.83      | 30.53 | P < 0.001 | 68.89 to 94.78   |
| CT vs 10                         | 89.79      | 33.50 | P < 0.001 | 76.84 to 102.7   |
| CT vs 15                         | 94.27      | 35.17 | P < 0.001 | 81.32 to 107.2   |
| 0.5 vs 1.0                       | -11.86     | 4.425 | P > 0.05  | -24.80 to 1.082  |
| 0.5 vs 2.5                       | 16.40      | 6.119 | P < 0.01  | 3.458 to 29.34   |
| 0.5 vs 5.0                       | 32.03      | 11.95 | P < 0.001 | 19.09 to 44.98   |
| 0.5 vs 10                        | 39.99      | 14.92 | P < 0.001 | 27.04 to 52.93   |
| 0.5 vs 15                        | 44.47      | 16.59 | P < 0.001 | 31.52 to 57.41   |
| 1.0 vs 2.5                       | 28.26      | 10.54 | P < 0.001 | 15.32 to 41.20   |
| 1.0 vs 5.0                       | 43.89      | 16.38 | P < 0.001 | 30.95 to 56.84   |
| 1.0 vs 10                        | 51.85      | 19.35 | P < 0.001 | 38.90 to 64.79   |
| 1.0 vs 15                        | 56.33      | 21.02 | P < 0.001 | 43.38 to 69.27   |
| 2.5 vs 5.0                       | 15.63      | 5.833 | P < 0.05  | 2.691 to 28.58   |
| 2.5 vs 10                        | 23.59      | 8.801 | P < 0.001 | 10.64 to 36.53   |
| 2.5 vs 15                        | 28.07      | 10.47 | P < 0.001 | 15.12 to 41.01   |
| 5.0 vs 10                        | 7.953      | 2.968 | P > 0.05  | -4.989 to 20.90  |
| 5.0 vs 15                        | 12.43      | 4.639 | P > 0.05  | -0.5086 to 25.38 |
| 10 vs 15                         | 4.480      | 1.672 | P > 0.05  | -8.462 to 17.42  |
